# Supplementary material for: Hymenoptera Allergy Diagnosis through Their Presence on Human Food
Source: MDPI journal article supplement (doi:10.3390/toxins15120680), 2023-12-01
Supplement: s1 [file s1]

**Table S1.** Insects and source of food: Positive and Negative Predictive Values

|                  | <i>Vespula</i> YES | <i>Vespula</i> NO | Total |  |          |               |
|------------------|--------------------|-------------------|-------|--|----------|---------------|
| Carbohydrate YES | 14                 | 10                | 24    |  | PPV      | 0.58333333    |
| Carbohydrate NO  | 42                 | 5                 | 47    |  | NPV      | 0.10638298    |
|                  | 56                 | 15                | 71    |  | <i>P</i> | <b>0.0046</b> |

|             | <i>Vespula</i> YES | <i>Vespula</i> NO | Total |  |          |               |
|-------------|--------------------|-------------------|-------|--|----------|---------------|
| Protein YES | 42                 | 5                 | 47    |  | PPV      | 0.89361702    |
| Protein NO  | 14                 | 10                | 24    |  | NPV      | 0.41666667    |
|             | 56                 | 15                | 71    |  | <i>P</i> | <b>0.0046</b> |

|                  | <i>Polistes</i> YES | <i>Polistes</i> NO | Total |  |          |               |
|------------------|---------------------|--------------------|-------|--|----------|---------------|
| Carbohydrate YES | 4                   | 20                 | 24    |  | PPV      | 0.16666667    |
| Carbohydrate NO  | 0                   | 47                 | 47    |  | NPV      | 1             |
|                  | 4                   | 67                 | 71    |  | <i>P</i> | <b>0.0109</b> |

|             | <i>Polistes</i> YES | <i>Polistes</i> NO | Total |  |          |               |
|-------------|---------------------|--------------------|-------|--|----------|---------------|
| Protein YES | 0                   | 47                 | 47    |  | PPV      | 0             |
| Protein NO  | 4                   | 20                 | 24    |  | NPV      | 0.83333333    |
|             | 4                   | 67                 | 71    |  | <i>P</i> | <b>0.0109</b> |

|                  | <i>Vespa</i> YES | <i>Vespa</i> NO | Total |  |          |            |
|------------------|------------------|-----------------|-------|--|----------|------------|
| Carbohydrate YES | 3                | 21              | 24    |  | PPV      | 0.125      |
| Carbohydrate NO  | 4                | 43              | 47    |  | NPV      | 0.91489362 |
|                  | 7                | 64              | 71    |  | <i>P</i> | 0.6817     |

|             | <i>Vespa</i> YES | <i>Vespa</i> NO | Total |  |          |            |
|-------------|------------------|-----------------|-------|--|----------|------------|
| Protein YES | 4                | 43              | 47    |  | PPV      | 0.08510638 |
| Protein NO  | 3                | 21              | 24    |  | NPV      | 0.875      |
|             | 7                | 64              | 71    |  | <i>P</i> | 0.6817     |

|                  | <i>Apis</i> YES | <i>Apis</i> NO | Total |  |          |            |
|------------------|-----------------|----------------|-------|--|----------|------------|
| Carbohydrate YES | 1               | 23             | 24    |  | PPV      | 0.04166667 |
| Carbohydrate NO  | 0               | 47             | 47    |  | NPV      | 1          |
|                  | 1               | 70             | 71    |  | <i>P</i> | 0.338      |

|             | <i>Apis</i> YES | <i>Apis</i> NO | Total |  |          |            |
|-------------|-----------------|----------------|-------|--|----------|------------|
| Protein YES | 0               | 47             | 47    |  | PPV      | 0          |
| Protein NO  | 1               | 23             | 24    |  | NPV      | 0.95833333 |
|             | 1               | 70             | 71    |  | <i>P</i> | 0.338      |

---

|                  | <i>Bombus</i> YES | <i>Bombus</i> NO | Total |  |          |           |
|------------------|-------------------|------------------|-------|--|----------|-----------|
| Carbohydrate YES | 0                 | 24               | 24    |  | PPV      | 0         |
| Carbohydrate NO  | 1                 | 46               | 47    |  | NPV      | 0.9787234 |
|                  | 1                 | 70               | 71    |  | <i>P</i> | 1         |

|             | <i>Bombus</i> YES | <i>Bombus</i> NO | Total |  |          |            |
|-------------|-------------------|------------------|-------|--|----------|------------|
| Protein YES | 1                 | 45               | 46    |  | PPV      | 0.02173913 |
| Protein NO  | 0                 | 25               | 25    |  | NPV      | 1          |
|             | 1                 | 70               | 71    |  | <i>P</i> | 1          |

|                  | Others YES | Others NO | Total |  |          |            |
|------------------|------------|-----------|-------|--|----------|------------|
| Carbohydrate YES | 1          | 23        | 24    |  | PPV      | 0.04166667 |
| Carbohydrate NO  | 1          | 46        | 47    |  | NPV      | 0.9787234  |
|                  | 2          | 69        | 71    |  | <i>P</i> | 1          |

|             | Others YES | Others NO | Total |  |          |            |
|-------------|------------|-----------|-------|--|----------|------------|
| Protein YES | 1          | 46        | 47    |  | PPV      | 0.0212766  |
| Protein NO  | 1          | 23        | 24    |  | NPV      | 0.95833333 |
|             | 2          | 69        | 71    |  | <i>P</i> | 1          |

|          | <i>Vespula</i> YES | <i>Vespula</i> NO | Total |  |          |              |
|----------|--------------------|-------------------|-------|--|----------|--------------|
| Meat YES | 31                 | 3                 | 34    |  | PPV      | 0.91176471   |
| Meat NO  | 25                 | 12                | 37    |  | NPV      | 0.32432432   |
|          | 56                 | 15                | 71    |  | <i>P</i> | <b>0.037</b> |

|             | <i>Vespula</i> YES | <i>Vespula</i> NO | Total |  |          |            |
|-------------|--------------------|-------------------|-------|--|----------|------------|
| Seafood YES | 6                  | 0                 | 6     |  | PPV      | 1          |
| Seafood NO  | 50                 | 15                | 65    |  | NPV      | 0.23076923 |
|             | 56                 | 15                | 71    |  | <i>P</i> | 0.591      |

PPV= Positive Predictive Value; PPN= Negative Predictive Value;  $P < 0.05$  were considered statistically significant.
